# Supplementary material for: Early intravenous beta-blockers in patients undergoing primary percutaneous coronary intervention for ST-segment elevation myocardial infarction: A patient-pooled meta-analysis of randomized clinical trials
Source: PubMed Central journal article supplement — Eur Heart J Acute Cardiovasc Care. 2019 Feb 14;9(5):469–77. doi: 10.1177/2048872619830609 (PMC7672673; doi:10.1177/2048872619830609), 2019-02-14

Supplemental Material

Supplementary Table 1 Trial Quality and Risk of Bias

|                                   | <b>Trial centers</b> | <b>Intention to treat principle</b> | <b>Random sequence generation (risk of selection bias)</b> | <b>Allocation concealment (risk of selection bias)</b> | <b>Blinding (risk of performance bias)</b> | <b>Blinding (risk of detection bias)</b> | <b>Incomplete outcome data (risk of attrition bias)</b> | <b>Selective reporting (risk of reporting bias)</b> |
|-----------------------------------|----------------------|-------------------------------------|------------------------------------------------------------|--------------------------------------------------------|--------------------------------------------|------------------------------------------|---------------------------------------------------------|-----------------------------------------------------|
| <b>BEAT-AMI</b> <sup>5</sup>      | 1                    | yes                                 | low                                                        | low                                                    | low                                        | unclear risk                             | low                                                     | low                                                 |
| <b>EARLY-BAMI</b> <sup>6</sup>    | 14                   | yes                                 | low                                                        | low                                                    | low                                        | low                                      | low                                                     | low                                                 |
| <b>Hanada et al.</b> <sup>7</sup> | 1                    | yes                                 | low                                                        | high                                                   | high                                       | unclear risk                             | low                                                     | low                                                 |
| <b>METOCARD-CNIC</b> <sup>8</sup> | 7                    | yes                                 | low                                                        | high                                                   | high                                       | low                                      | low                                                     | low                                                 |

Supplemetnary Table 2

## Baseline characteristics

|                                 | BEAT-AMI     |             | EARLY-BAMI    |               | Hanada et al. |             | METOCARD-CINC |               |
|---------------------------------|--------------|-------------|---------------|---------------|---------------|-------------|---------------|---------------|
|                                 | Beta-blocker | Control     | Beta-blocker  | Control       | Beta-blocker  | Control     | Beta-blocker  | Control       |
|                                 | (n = 50)     | (n = 51)    | (n = 336)     | (n = 347)     | (n = 47)      | (n = 49)    | (n = 139)     | (n = 131)     |
| <i>Baseline characteristics</i> |              |             |               |               |               |             |               |               |
| Age, year, mean $\pm$ SD        | 58 $\pm$ 11  | 62 $\pm$ 12 | 62 $\pm$ 12   | 62 $\pm$ 13   | 63 $\pm$ 11   | 61 $\pm$ 14 | 59 $\pm$ 13   | 58 $\pm$ 11   |
| Male, %                         | 41/50 (82%)  | 36/51 (71%) | 251/336 (75%) | 259/347 (75%) | 40/47 (85%)   | 40/49 (82%) | 119/139 (86%) | 114/131 (87%) |
| BMI, mean $\pm$ SD              | 27 $\pm$ 4   | 26 $\pm$ 4  | 27 $\pm$ 4    | 27 $\pm$ 4    | 25 $\pm$ 3    | 25 $\pm$ 3  | 28 $\pm$ 4    | 28 $\pm$ 4    |
| Hypertension, %                 | 27/50 (54%)  | 26/51 (51%) | 135/335 (40%) | 133/344 (39%) | 33/47 (70%)   | 35/49 (71%) | 54/134 (40%)  | 54/128 (42%)  |
| Diabetes, %                     | 6/50 (12%)   | 6/51 (12%)  | 48/335 (14%)  | 62/347 (18%)  | 20/47 (43%)   | 21/49 (43%) | 31/133 (23%)  | 24/128 (19%)  |
| Smoking, %                      | 29/50 (58%)  | 24/51 (47%) | 132/316 (42%) | 137/320 (43%) | 28/47 (60%)   | 26/49 (53%) | 71/134 (53%)  | 69/128 (54%)  |
| Hyperlipidemia, %               | 13/50 (26%)  | 16/51 (31%) | 93/329 (28%)  | 82/338 (24%)  | 38/47 (81%)   | 38/49 (78%) | 53/133 (40%)  | 51/127 (40%)  |
| Previous MI, %                  | 1/50 (2%)    | 4/51 (8%)   | 10/332 (3%)   | 11/345 (3%)   | 4/47 (9%)     | 2/49 (4%)   | NA            | NA            |
| Previous PCI, %                 | 1/50 (2%)    | 5/51 (10%)  | 21/333 (6%)   | 16/346 (5%)   | 8/47 (17%)    | 3/49 (6%)   | NA            | NA            |
| Previous CABG, %                | 1/50 (2%)    | 0/51 (0%)   | 1/333 (0%)    | 6/346 (2%)    | 2/47 (4%)     | 0/49 (0%)   | NA            | NA            |
| Prior beta-blocker use, %       | NA           | NA          | 54/329 (16%)  | 60/343 (18%)  | NA            | NA          | NA            | NA            |
| <i>Clinical presentation</i>    |              |             |               |               |               |             |               |               |
| Killip class I, %               | NA           | NA          | 275/290 (95%) | 290/308 (94%) | 46/47 (98%)   | 45/49 (92%) | 124/135 (92%) | 112/128 (88%) |
| Killip class II, %              | NA           | NA          | 12/290 (4%)   | 13/308 (4%)   | 1/47 (2%)     | 4/49 (8%)   | 11/135 (8%)   | 14/128 (11%)  |

|                                                |               |               |               |               |               |               |               |               |
|------------------------------------------------|---------------|---------------|---------------|---------------|---------------|---------------|---------------|---------------|
| Baseline SBP, mmHg, mean $\pm$ SD              | 138 $\pm$ 21  | 138 $\pm$ 22  | 147 $\pm$ 25  | 147 $\pm$ 25  | 126 $\pm$ 18  | 131 $\pm$ 18  | 143 $\pm$ 19  | 142 $\pm$ 19  |
| Baseline DBP, mmHg, mean $\pm$ SD              | 83 $\pm$ 12   | 84 $\pm$ 12   | 90 $\pm$ 16   | 90 $\pm$ 17   | 74 $\pm$ 12   | 74 $\pm$ 12   | 89 $\pm$ 16   | 88 $\pm$ 16   |
| Baseline HR, beat/min, mean $\pm$ SD           | 79 $\pm$ 15   | 79 $\pm$ 14   | 79 $\pm$ 15   | 80 $\pm$ 16   | 80 $\pm$ 16   | 79 $\pm$ 12   | 82 $\pm$ 14   | 82 $\pm$ 14   |
| SBP after intervention, mmHg, mean $\pm$ SD    | 116 $\pm$ 13  | 120 $\pm$ 16  | 136 $\pm$ 23  | 139 $\pm$ 26  | 117 $\pm$ 16  | 119 $\pm$ 14  | 129 $\pm$ 20  | NA            |
| DBP after intervention, mmHg, mean $\pm$ SD    | 68 $\pm$ 8    | 72 $\pm$ 10   | 82 $\pm$ 15   | 83 $\pm$ 16   | 67 $\pm$ 11   | 68 $\pm$ 12   | 82 $\pm$ 15   | NA            |
| HR after intervention, beat/min, mean $\pm$ SD | 68 $\pm$ 9    | 74 $\pm$ 12   | 74 $\pm$ 14   | 79 $\pm$ 16   | 70 $\pm$ 12   | 77 $\pm$ 13   | 69 $\pm$ 12   | NA            |
| <i>Hospitalization</i>                         |               |               |               |               |               |               |               |               |
| Reperfusion time, minutes, median (IQR)        | 162 (117-248) | 157 (115-238) | 171 (129-263) | 171 (120-272) | 270 (198-270) | 270 (191-387) | 186 (145-230) | 180 (143-224) |
| Infarct related artery                         |               |               |               |               |               |               |               |               |
| LAD, %                                         | 17/50 (34%)   | 28/51 (55%)   | 154/312 (49%) | 165/318 (52%) | 25/47 (53%)   | 29/49 (59%)   | 120/126 (95%) | 115/122 (94%) |
| LCX, %                                         | 5/50 (10%)    | 4/51 (8%)     | 44/312 (14%)  | 44/318 (14%)  | 11/47 (23%)   | 6/49 (12%)    | 2/126 (2%)    | 2/122 (2%)    |
| RCA, %                                         | 28/50 (56%)   | 19/51 (37%)   | 113/312 (36%) | 105/318 (33%) | 11/47 (23%)   | 14/49 (29%)   | 3/126 (2%)    | 4/122 (3%)    |
| No. Diseased coronary vessels                  |               |               |               |               |               |               |               |               |
| 1, %                                           | 26/50 (52%)   | 27/51 (53%)   | 175/330 (53%) | 201/339 (59%) | 24/47 (51%)   | 26/49 (53%)   | NA            | NA            |
| 2, %                                           | 16/50 (32%)   | 10/51 (20%)   | 100/330 (30%) | 71/339 (21%)  | 8/47 (17%)    | 10/49 (20%)   | NA            | NA            |
| 3, %                                           | 8/50 (16%)    | 14/51 (28%)   | 39/330 (12%)  | 46/339 (14%)  | 15/47 (32%)   | 13/49 (27%)   | NA            | NA            |
| Primary PCI during admission, %                | 50/50 (100%)  | 51/51 (100%)  | 306/335 (91%) | 308/346 (89%) | 47/47 (100%)  | 49/49 (100%)  | 126/129 (98%) | 120/123 (98%) |
| CABG during admission, %                       | 0/50 (0%)     | 0/51 (0%)     | 12/336 (4%)   | 22/347 (6%)   | 0/47 (0%)     | 0/49 (0%)     | 0/139 (0%)    | 0/131 (0%)    |
| Beta-blocker at discharge, %                   | NA            | NA            | 260/333 (78%) | 249/341 (73%) | 45/47 (96%)   | 46/49 (94%)   | 115/135 (85%) | 118/129 (92%) |

Admission length, days, median (IQR)      NA                      NA                      2 (1-5)                      2 (1-4)                      NA                      NA                      5 (4-7)                      5 (4-6)

BMI: body mass index, CABG: coronary artery bypass grafting, DBP: diastolic blood pressure, IQR: interquartile range, MI: myocardial infarction, PCI: percutaneous coronary intervention, SBP: systolic blood pressure, SD: standard deviation

**Supplementary table 3**      **Biomarker-based** infarct size

|                                  | <b>BEAT-AMI</b>            |                             | <b>EARLY-BAMI</b>            |                              | <b>Hanada et al.</b>        |                             | <b>METOCARD-CINC</b>         |                               |
|----------------------------------|----------------------------|-----------------------------|------------------------------|------------------------------|-----------------------------|-----------------------------|------------------------------|-------------------------------|
|                                  | <b>Beta-blocker</b>        | <b>Control</b>              | <b>Beta-blocker</b>          | <b>Control</b>               | <b>Beta-blocker</b>         | <b>Control</b>              | <b>Beta-blocker</b>          | <b>Control</b>                |
|                                  | <b>(n = 50)</b>            | <b>(n = 51)</b>             | <b>(n = 336)</b>             | <b>(n = 347)</b>             | <b>(n = 47)</b>             | <b>(n = 49)</b>             | <b>(n = 139)</b>             | <b>(n = 131)</b>              |
| CK peak, U/l, median (IQR)       | 619 (252-1720)<br>(n = 50) | 1413 (644-2647)<br>(n = 50) | 1277 (355-2890)<br>(n = 324) | 1079 (327-2685)<br>(n = 334) | 1277 (355-2890)<br>(n = 47) | 1079 (327-2685)<br>(n = 49) | 2217 (877-4152)<br>(n = 137) | 3559 (1118-5593)<br>(n = 128) |
| CK-MB, U/l, median (IQR)         | 74 (30-200)<br>(n = 50)    | 157 (74-313)<br>(n = 50)    | 141 (59-325)<br>(n = 217)    | 134 (47-284)<br>(n = 218)    | 241 (85-352)<br>(n = 47)    | 212 (104-338)<br>(n = 49)   | NA                           | NA                            |
| CK-MB, µg/l, median (IQR)        | NA                         | NA                          | 155 (65-440)<br>(n = 63)     | 114 (41-324)<br>(n = 70)     | NA                          | NA                          | NA                           | NA                            |
| CK-MB AUC, (U*h/l), median (IQR) | NA                         | NA                          | 2610 (926-5885)<br>(n = 204) | 2561 (929-5498)<br>(n = 202) | NA                          | NA                          | NA                           | NA                            |

|                                           |                             |                              |                                  |                                   |    |    |    |    |
|-------------------------------------------|-----------------------------|------------------------------|----------------------------------|-----------------------------------|----|----|----|----|
| Troponin T peak, ng/l,<br>median (IQR)    | 1290 (528-4843)<br>(n = 50) | 3175 (1403-5390)<br>(n = 50) | 1780 (257-5890)<br>(n = 291)     | 1600 (187-5802)<br>(n = 304)      | NA | NA | NA | NA |
| Troponin I peak, µg/l,<br>median (IQR)    | NA                          | NA                           | 45 (11-211)<br>(n = 29)          | 63 (20-133)<br>(n = 34)           | NA | NA | NA | NA |
| Troponin T AUC,<br>(ng*h/l), median (IQR) | NA                          | NA                           | 51230 (8653-153825)<br>(n = 226) | 52826 (13580-133547)<br>(n = 228) | NA | NA | NA | NA |

AUC : area under the curve, CK: creatine-kinase, CK-MB: creatine-kinase isoenzyme brain/muscle, IQR: interquartile range

#### Supplementary table 4 Clinical outcomes

|                                           | BEAT-AMI                 |                     | EARLY-BAMI                |                      | Hanada et al.            |                     | METOCARD-CINC             |                      |
|-------------------------------------------|--------------------------|---------------------|---------------------------|----------------------|--------------------------|---------------------|---------------------------|----------------------|
|                                           | Beta-blocker<br>(n = 50) | Control<br>(n = 51) | Beta-blocker<br>(n = 336) | Control<br>(n = 347) | Beta-blocker<br>(n = 47) | Control<br>(n = 49) | Beta-blocker<br>(n = 139) | Control<br>(n = 131) |
| <i>Left ventricular ejection fraction</i> |                          |                     |                           |                      |                          |                     |                           |                      |
| 1 month, mean ± SD                        | 63 ± 9<br>(n = 49)       | 59 ± 9<br>(n = 49)  | 51 ± 11<br>(n = 162)      | 52 ± 11<br>(n = 169) | NA                       | NA                  | 46 ± 9<br>(n = 105)       | 43 ± 10<br>(n = 114) |
| 6 months , mean ± SD                      | 62 ± 10<br>(n = 50)      | 60 ± 10<br>(n = 48) | NA                        | NA                   | 52 ± 9<br>(n = 41)       | 50 ± 9<br>(n = 42)  | 48 ± 10<br>(n = 98)       | 45 ± 12<br>(n = 101) |
| <i>Seven days clinical outcomes</i>       |                          |                     |                           |                      |                          |                     |                           |                      |

|                                               |             |             |               |               |               |               |              |               |
|-----------------------------------------------|-------------|-------------|---------------|---------------|---------------|---------------|--------------|---------------|
| Death or myocardial infarction                | NA          | NA          | 7/335 (2.1%)  | 7/345 (2.1%)  | 0/47 (0.0%)   | 0/49 (0.0%)   | 3/139 (2.2%) | 2/131 (1.5%)  |
| All-cause mortality                           | 0/50 (0.0%) | 0/51 (0.0%) | 4/335 (1.2%)  | 5/345 (1.5%)  | 0/47 (0.0%)   | 0/49 (0.0%)   | 2/139 (1.5%) | 2/131 (1.5%)  |
| Cardiac death                                 | 0/50 (0.0%) | 0/51 (0.0%) | 3/335 (0.9%)  | 5/345 (1.5%)  | 0/47 (0.0%)   | 0/49 (0.0%)   | 2/139 (1.5%) | 2/131 (1.5%)  |
| Myocardial infarction                         | NA          | NA          | 3/335 (0.9%)  | 2/345 (0.6%)  | 0/47 (0.0%)   | 0/49 (0.0%)   | 1/139 (0.7%) | 0/131 (0.0%)  |
| <i>One-year clinical outcomes</i>             |             |             |               |               |               |               |              |               |
| Death or MI                                   | NA          | NA          | 14/335 (4.4%) | 13/345 (4.0%) | 1/47 (2.1%)   | 2/49 (4.1%)   | 6/139 (4.5%) | 7/131 (5.5%)  |
| All-cause mortality                           | 0/50 (0.0%) | 1/51 (2.0%) | 11/335 (4.4%) | 11/345 (3.5%) | 0/47 (0.0%)   | 2/49 (4.1%)   | 5/139 (3.7%) | 5/131 (3.9%)  |
| Cardiac death                                 | 0/50 (0.0%) | 1/51 (2.0%) | 7/335 (2.2%)  | 8/345 (2.4%)  | 0/47 (0.0%)   | 0/49 (0.0%)   | 4/139 (3.0%) | 5/131 (3.9%)  |
| MI                                            | NA          | NA          | 3/335 (0.9%)  | 2/345 (0.6%)  | 1/47 (2.1%)   | 0/49 (0.0%)   | 1/139 (0.7%) | 2/131 (1.6%)  |
| <i>Safety outcomes during hospitalization</i> |             |             |               |               |               |               |              |               |
| Composite safety outcome                      | NA          | NA          | 15/334 (4.5%) | 10/345 (2.9%) | 1/47 (2.1%)   | 0/49 (0.0%)   | 6/139 (4.3%) | 9/131 (6.9%)  |
| Ventricular tachycardia                       | NA          | NA          | 10/336 (3.0%) | 10/347 (3.0%) | 21/47 (44.7%) | 12/49 (24.5%) | 5/139 (3.6%) | 10/131 (7.6%) |

---

MI: myocardial infarction, NA: not available, SD: standard deviation

Safety outcome is the composite of cardiogenic shock, symptomatic bradycardia or hypotension

One-year efficacy outcomes are Kaplan-Meier estimates, compared with a log-rank test. Safety outcome and ventricular tachycardia are percentages, compared with a Chi-square test.



Supplemental Figure S2

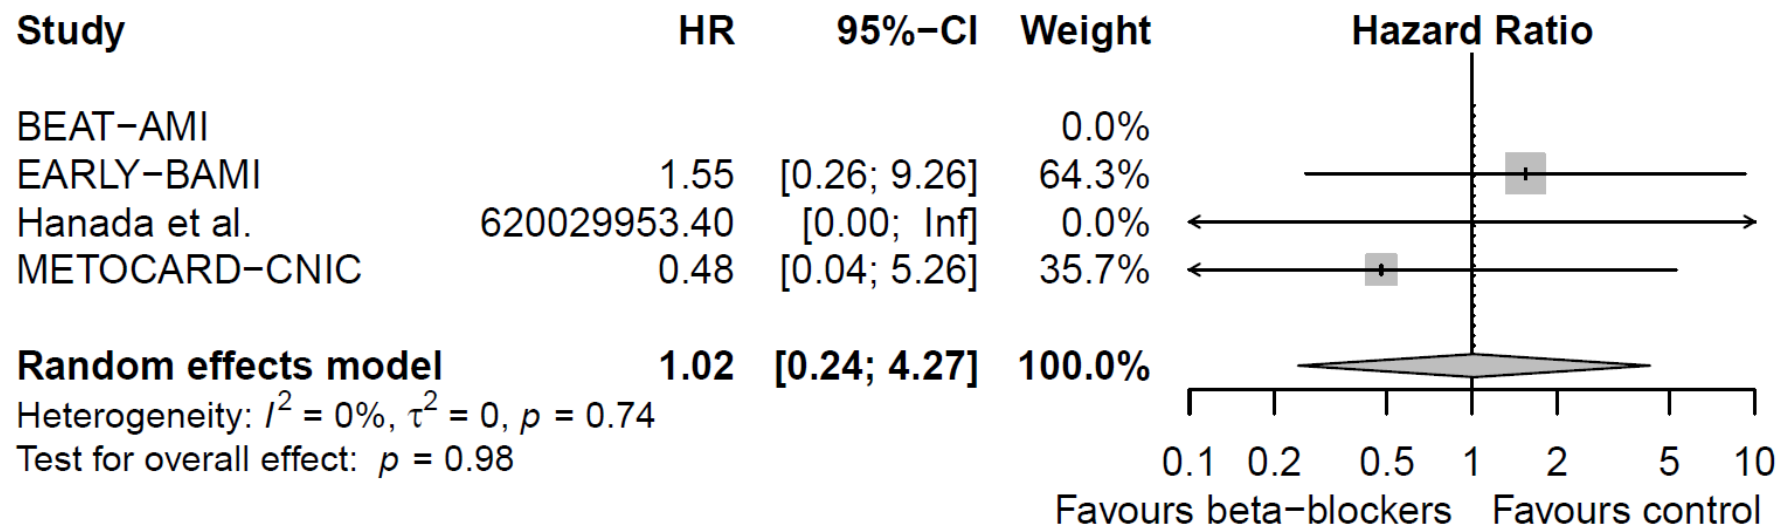



Supplemental Figure S3

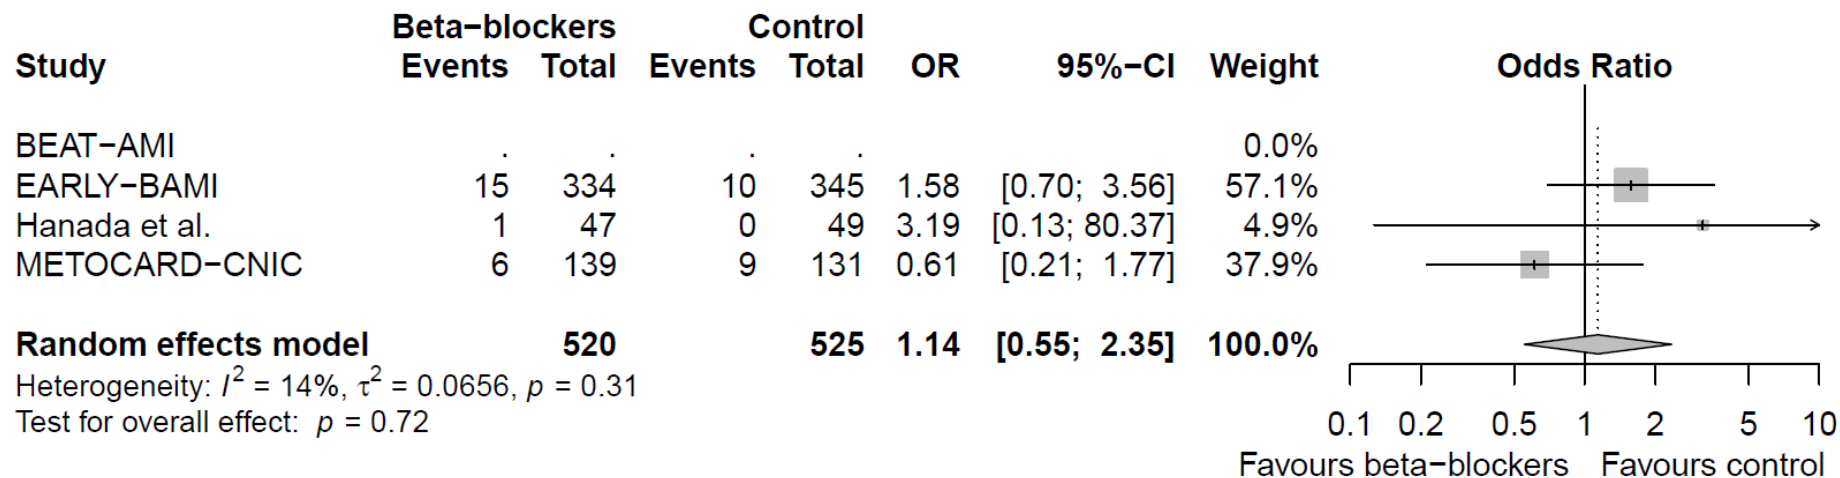

Supplemental Figure S4

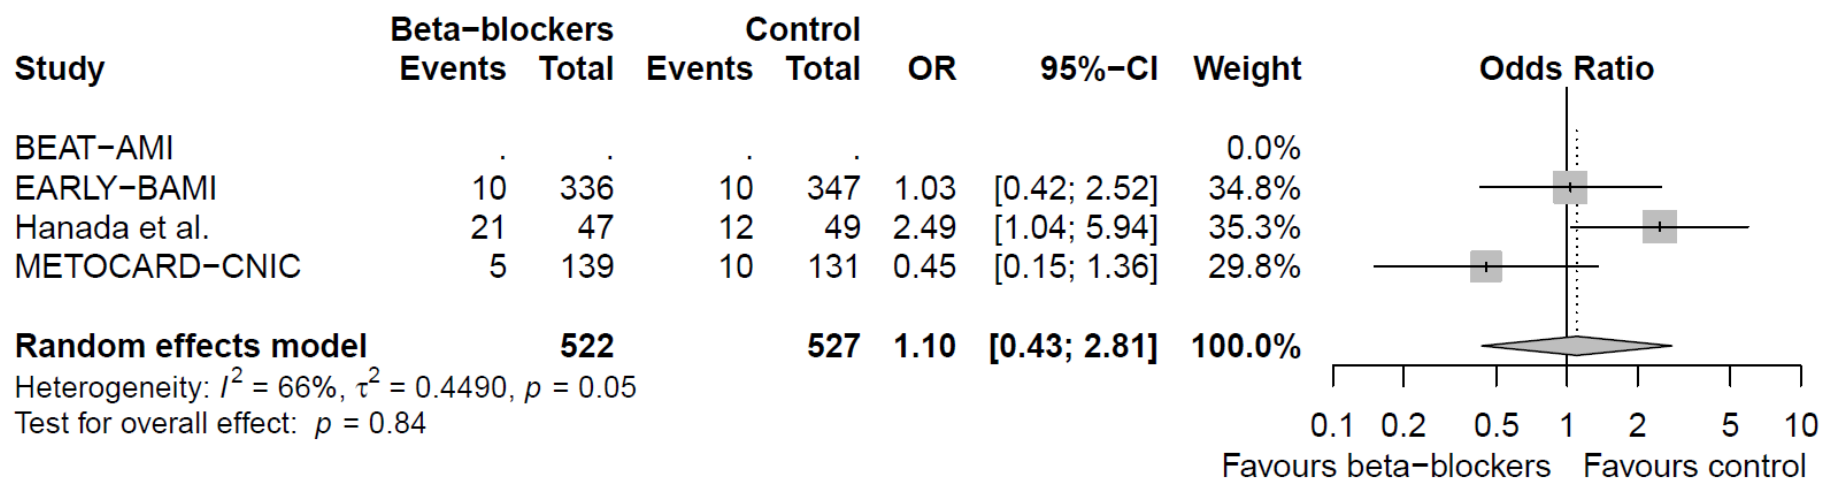

Supplement: Supplemental_Material.pdf [file Supplemental_Material.pdf]
